# Supplementary material
Source: MDPI journal article supplement (https://www.mdpi.com/2073-4395/13/12/3074)
Supplement: s1 [file s1]

# **Soil Salinity Mapping of Croplands in Arid Areas Based on the Soil-Land Inference Model**

**(Supplementary material for online publication only)**

# Supplementary information

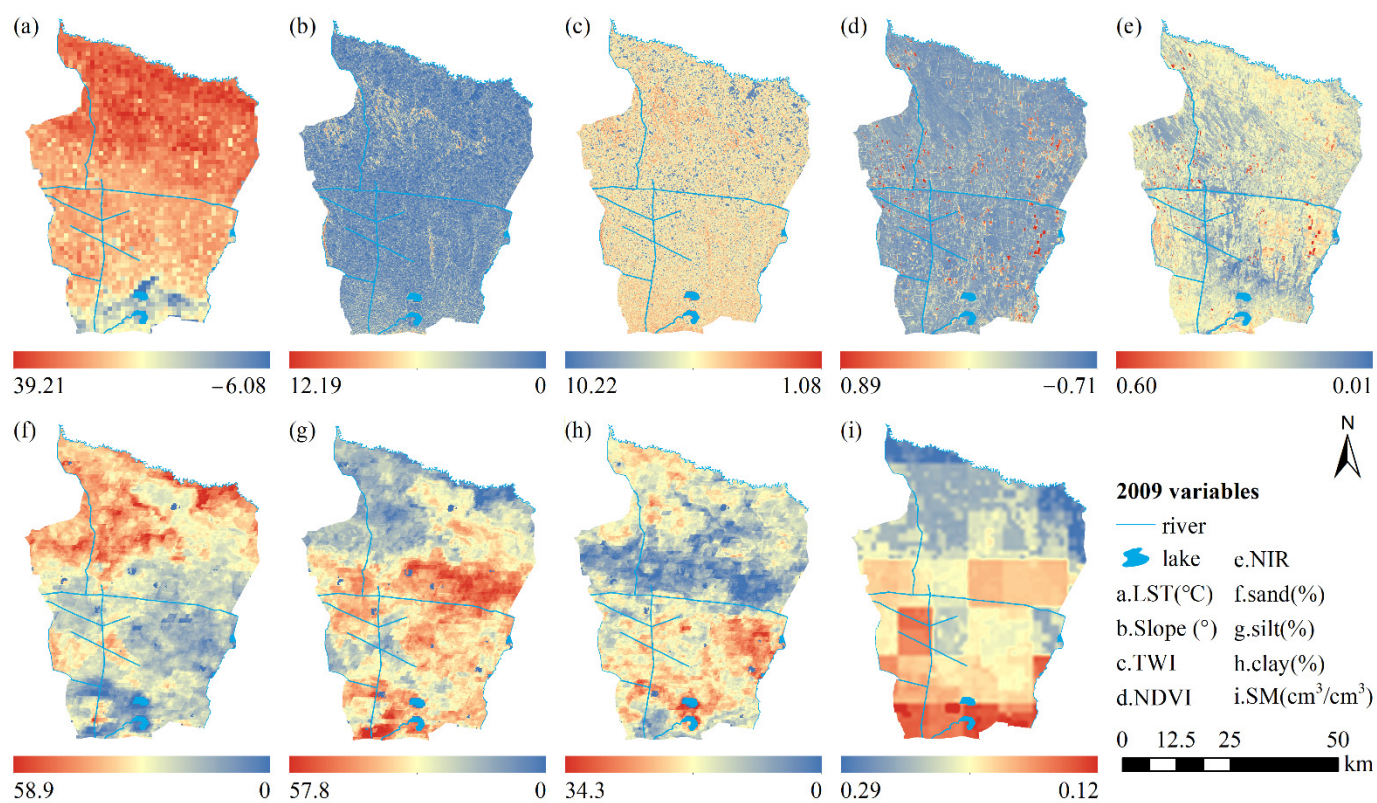

Figure S1. environmental variables in 2009

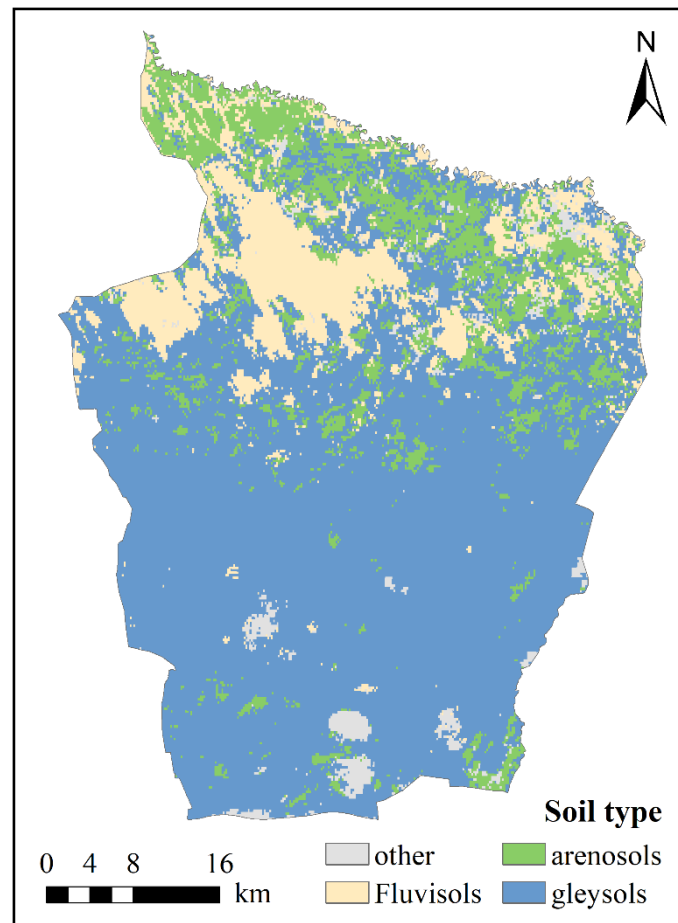

**Figure S2.** Distribution of main soil types in the study area
